# Supplementary material
Source: ML conference proceedings conference paper supplement (https://proceedings.neurips.cc/paper_files/paper/2019/hash/58aaee7ae94b52697ad3b9275d46ec7f-Abstract.html)
Supplement: Supplementary file [file 58aaee7ae94b52697ad3b9275d46ec7f-Supplemental.zip]

---

# Focused Quantization for Sparse DNNs

## Supplementary Material

---

Anonymous Author(s)

Affiliation

Address

email

### 1 Training Configuration

For image preprocessing, we follow the augmentation procedures in Krizhevsky *et al.* [2012], which includes aspect ratio distortion, random flipping, random cropping, and hue, saturation, contrast and brightness changes to preprocess each training example.

### 2 Model Optimization

Here we provide the details of the model optimization explained in Section 3.5 in the form of an algorithm. Algorithm 1 optimizes  $\mathcal{L}(\theta, \phi)$ , where  $E$  specifies the number of epochs to fine-tune the quantized sparse model, and it returns the final optimized hyperparameters  $\phi^*$  and quantized weights  $\mathbf{Q}_{\phi^*}[\theta]$ . Note that we assume the pruned weights given by the pruning constant  $z_\theta$  to remain zero throughout fine-tuning.

---

**Algorithm 1** Model Optimization

---

```
1: function OPTIMIZE( $\theta, E$ )
2:    $e \leftarrow 0, k \leftarrow 1$ 
3:   while  $e < E$  do
4:      $\phi^* \leftarrow \operatorname{argmin}_{\phi} \operatorname{KL} \left( q_{\phi}^{\text{mix}}(\theta) \| p(\theta) \right)$ 
5:     for  $\theta \in \theta$  do
6:       Sample the component selector  $m_\theta$  in  $\phi^*$ 
7:     end for
8:     for  $k$  epochs do
9:       Sample a mini-batch  $(\tilde{\mathbf{x}}, \tilde{\mathbf{y}})$  from  $\mathcal{D}$ 
10:       $\theta \leftarrow \text{SGD}(-\log p(\tilde{\mathbf{y}}|\tilde{\mathbf{x}}, \mathbf{Q}_{\phi^*}[\theta]))$ 
11:    end for
12:     $e \leftarrow e + k, k \leftarrow 2k$ 
13:  end while
14:  return  $\phi^*, \mathbf{Q}_{\phi^*}[\theta]$ 
15: end function
```

---

For ResNet-50 on ImageNet, line 4 in the algorithm above takes 24 minutes to complete on an Intel Core i7-6700k CPU, while each epoch of the SGD optimization (line 8–11) requires 1.5 GPU-day to complete on an Nvidia GTX 1080 Ti. For each Image model we fine-tune for 10 epochs.

### 14 3 Bit-width Saving Tricks

15 Recentralized quantization Q is designed to capture the high-probability components in the weight  
16 distribution, which in theory provides a less redundant use of bits compared to shift quantization.  
17 We further reduce the bit-width by removing certain representable values that occur rarely after  
18 quantization. Although it does not bring better compression rates for Huffman-coded weights because  
19 we are removing rarely used values, it lowers the number of bits required for representing weights  
20 assuming constant bit-widths.

21 The tricks are generally applicable. Consider the  $c_-$  (orange) and  $c_+$  (blue) Gaussian components  
22 in the first block of Figure 2 in the paper, it is notable that the means  $\mu_-$  and  $\mu_+$  are surrounded  
23 with many fine-grained quantization levels, thus sacrificing these representations by quantizing to  
24 nearby values is equivalently efficient. Similarly, very few values quantized by  $c_-$  lie about the  
25 well-quantized region of  $c_+$  and *vice versa*. It means that we can remove the largest representation  
26 from  $c_-$  and smallest representation from  $c_+$ . By removing these values from the representation, we  
27 use exactly *at most*  $n$  bits to represent a Q quantized value which internally uses  $(n - 1)$ -bit shift  
28 quantization. To further simplify computation, we constrain  $\sigma_-$  and  $\sigma_+$  to the nearest powers-of-two  
29 values. For instance, a 3-bit recentralized quantization uses the following representable values  
30  $\{-9, -5, 3\} \cup \{-3, 5, 9\} \cup \{0\}$  if  $\alpha_l = 1, \mu_- = -1, \mu_+ = 1, b = 0$ , where the first two sets  
31 correspond to values quantized by the  $c_-$  and  $c_+$  components respectively.

### 32 References

33 Alex Krizhevsky, Ilya Sutskever, and Geoffrey E Hinton. Imagenet classification with deep convolu-  
34 tional neural networks. In *Advances in Neural Information Processing Systems* 25. 2012.
